# Supplementary material for: Protein−Protein Interfaces Probed by Methyl Labeling and Proton‐Detected Solid‐State NMR Spectroscopy
Source: PubMed Central journal article supplement — Chemphyschem. 2018 Jun 27;19(19):2457–60. doi: 10.1002/cphc.201800542 (PMC6220863; doi:10.1002/cphc.201800542), 2018-06-27
Supplement: CPHC-19-2457-s001.pdf [file CPHC-19-2457-s001.pdf]

## Supporting Information

© Copyright Wiley-VCH Verlag GmbH & Co. KGaA, 69451 Weinheim, 2018

### **Protein–Protein Interfaces Probed by Methyl Labeling and Proton-Detected Solid-State NMR Spectroscopy**

Maximilian Zinke, Pascal Fricke, Sascha Lange, Sophie Zinn-Justin, and Adam Lange\*© 2018 The Authors. Published by Wiley-VCH Verlag GmbH & Co. KGaA. This is an open access article under the terms of the Creative Commons Attribution Non-Commercial NoDerivs License, which permits use and distribution in any medium, provided the original work is properly cited, the use is non-commercial and no modifications or adaptations are made.

## Experimental Section

### Sample preparation:

Three different protein samples were prepared: 1.) Isoleucine-C $\delta$ 1-methyl group-( $^1\text{H}\delta$ 1,  $^{13}\text{C}\delta$ 1)-u- $^{15}\text{N}$ -labeled gp17.1; 2.) Isoleucine-( $^1\text{H}\delta$ 1,  $^{13}\text{C}\delta$ 1,  $^{13}\text{C}\gamma$ 1,  $^{13}\text{C}\alpha$ ,  $^{13}\text{CO}$ )-u- $^{15}\text{N}$ -labeled gp17.1; and 3.) A mixed sample containing 50% Isoleucine-C $\delta$ 1-methyl group-( $^1\text{H}\delta$ 1,  $^{13}\text{C}\delta$ 1)-labeled gp17.1 and 50% u- $^{15}\text{N}$ -labeled gp17.1. Protons at labile sites were 100% back-exchanged in all samples. Generally, gp17.1 protein was expressed and purified as described in Zinke et al. 2017.<sup>[1]</sup>, with the exception that  $^{12}\text{C}_6, \text{D}_7$ -glucose was used instead of  $^{13}\text{C}_6, \text{D}_7$ -glucose.

For either isoleucine labeling scheme, 60 mg/L of the precursor molecules *2-Ketobutyric acid-4- $^{13}\text{C}$ -3,3- $d_2$*  (Sigma-Aldrich) or *2-Ketobutyric acid- $^{13}\text{C}_4$ -3,3- $d_2$*  ("assignment precursor", Sigma-Aldrich) (Supporting Information Figure S3) were added to the bacterial cultures 1 h prior to induction. Protein expression after IPTG induction was conducted for 3h. After protein purification, gp17.1 was stored at room temperature for 3 weeks to polymerize. Polymers were pelleted by ultracentrifugation at 500.000 x g for at least 10 h. From 2 L of bacterial culture, protein pellets of ~140 mg could be isolated after centrifugation for each sample.

For the mixed sample, isoleucine-C $\delta$ 1-methyl group-( $^1\text{H}\delta$ 1,  $^{13}\text{C}\delta$ 1)-labeled gp17.1 was expressed from 0.5 L of bacterial culture as described above but with  $^{14}\text{ND}_4\text{Cl}$  instead of  $^{15}\text{ND}_4\text{Cl}$  as the sole nitrogen source.  $^{15}\text{N}$ -labeled gp17.1 was expressed from 0.5 L bacterial culture containing  $^{12}\text{C}_6, \text{D}_7$ -glucose and  $^{15}\text{ND}_4\text{Cl}$  as the sole carbon and nitrogen sources. After purification, both gp17.1 species were united in a protein amount ratio of 1:1 before dialysis. Polymerization and ultracentrifugation were conducted as described above. A protein pellet of ~80 mg could be isolated after centrifugation. 1.9 mm rotors equipped with bottom spacers were filled with pelleted protein, a few DSS crystals for spectral referencing and temperature control<sup>[2]</sup>, and 1  $\mu\text{L}$  of  $\text{D}_2\text{O}$  for field locking.

### **Solid-state NMR spectroscopy:**

Solid-state NMR spectroscopy was conducted at an external magnetic field strength according to 900 MHz  $^1\text{H}$  Larmor frequency and with a 1.9 mm, four-channel ( $^1\text{H}$ ,  $^{13}\text{C}$ ,  $^{15}\text{N}$ ,  $^2\text{H}$ ) probe. The magic angle spinning (MAS) frequency was set to 40 kHz for all experiments and the temperature calibrated to around  $+18^\circ\text{C}$  by means of internally added DSS. Pulse program parameters, acquisition parameters and processing parameters for the presented experiments are summarized in Supporting Information Tables S1-S3.

The procedure for setting up the HccanH experiment for the isoleucine  $\text{C}\delta 1$  methyl assignment is not straightforward and thus explained in the following in detail: The  $\text{hC}\gamma 1$ -CP is optimized with a  $^{13}\text{C}$ -detected 1D experiment for maximum signal on  $\text{C}\gamma 1$ . Note: This experiment might require many scans due to low signal-to-noise (S/N) ratio from the limited number of isoleucines in the protein and  $^{13}\text{C}$  detection with a 1.9 mm probe. Next, following an offset switch from  $\text{C}\gamma 1$  to  $\text{C}\alpha$ , a DREAM pulse is further included in the pulse program, which is also optimized in a 1D  $^{13}\text{C}$ -detected experiment. Note: The S/N of this experiment is even lower and the magnetization stemming from the DREAM transfer is negative. An hCANH 1D experiment has to be set up following the conditions described in detail in Fricke et al. 2017.<sup>[3]</sup> After successful optimization, all steps can be assembled into the final HccanH experiment ( $\text{hC}\gamma 1$ -CP,  $\text{c}\gamma 1\text{C}\alpha$  DREAM,  $\text{c}\alpha\text{N}$ -CP and nH-CP).

### **Analytical size-exclusion chromatography:**

$\Delta\text{C-7}$  and  $\Delta\text{C-14}$  gp17.1 mutants were expressed in 0.5 L M9 medium containing  $^{15}\text{ND}_4\text{Cl}$  and  $^{13}\text{C}_6, \text{D}_7$ -glucose as the sole carbon and nitrogen sources, and purified as described previously. Storing the protein samples for 3 weeks at room temperature did not result in the protein solution undergoing a transition into a gel-like state (as observed for polymerizing gp17.1 at these concentrations usually). 200  $\mu\text{l}$  of the protein samples (at a protein concentration of  $\sim 5$  mg/mL) were directly loaded onto a Superdex

Increase 200 10/300 GL (GE Healthcare) column and equilibrated in the dialysis buffer (20 mM sodium phosphate, 500 mM sodium chloride, 1 mM EDTA, pH 7.4) using an Äkta pure 25 system (GE Healthcare). For molecular weight calibration, a Protein Standard Mix 15-600 kDa from Sigma-Aldrich was used.

#### **Solution NMR spectroscopy:**

Further 500  $\mu$ l of these protein solutions were supplemented with 50  $\mu$ l  $D_2O$  for field locking and used for solution NMR spectroscopy. Liquid-state NMR spectroscopy was conducted at an external magnetic field strength according to 750 MHz  $^1H$  Larmor frequency and a temperature of 25  $^{\circ}C$ . The protein correlation times were approximated by a method introduced by Anglister et al (via the amide proton  $T_2$  values).<sup>[4]</sup>

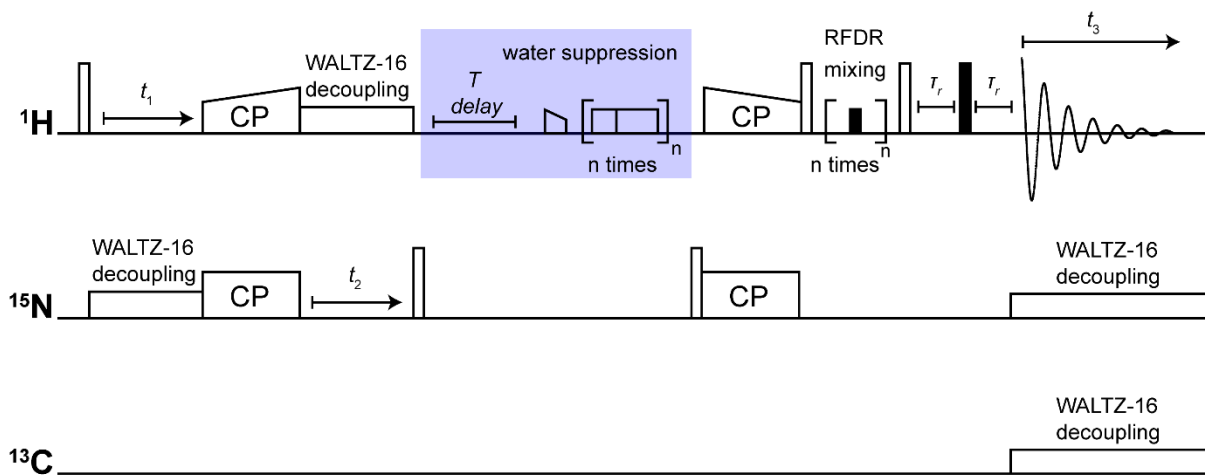

**Figure S1.** Scheme of the 3D HNhH pulse program. White rectangles represent  $90^\circ$  pulses and black rectangles  $180^\circ$  pulses, unless stated otherwise. The blue box represents water suppression.

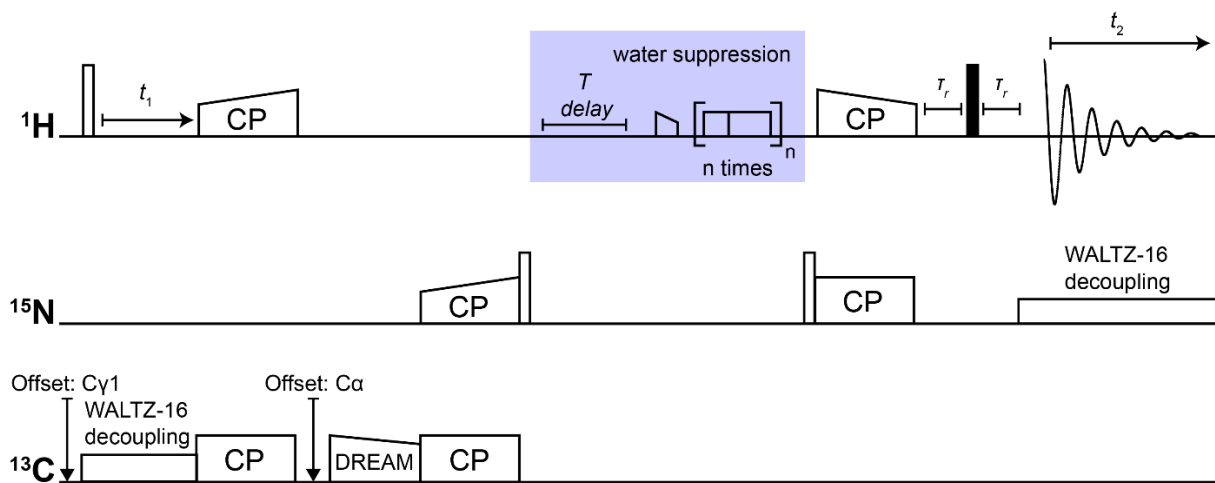

**Figure S2.** Scheme of the 2D HccanH pulse program. White rectangles represent  $90^\circ$  pulses and black rectangles  $180^\circ$  pulses, unless stated otherwise. The blue box represents water suppression.

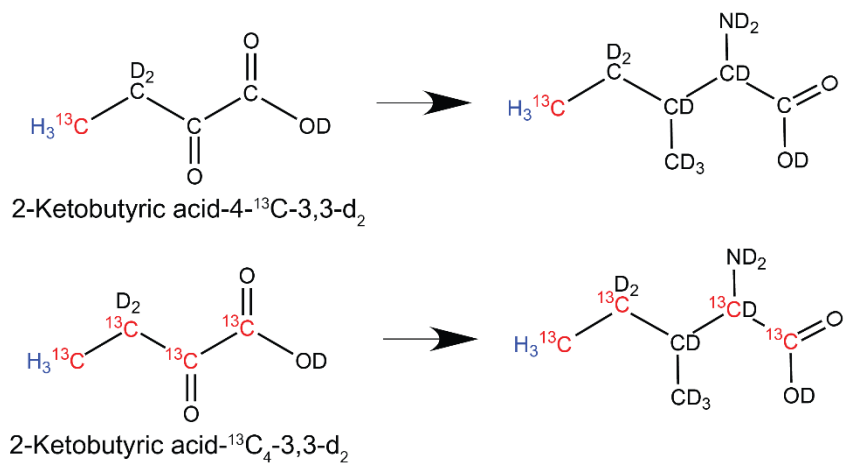

**Figure S3.** Isoleucine precursors. 2-Ketobutyric acid-4-<sup>13</sup>C-3,3-d<sub>2</sub> is used to selectively label the C $\delta$ 1 methyl group of isoleucines for the collection of long-distance restraints. 2-Ketobutyric acid-<sup>13</sup>C<sub>4</sub>-3,3-d<sub>2</sub> introduces multiple <sup>13</sup>C labels into the isoleucine side chain allowing for the assignment of the C $\delta$ 1 methyl groups ("Assignment precursor").

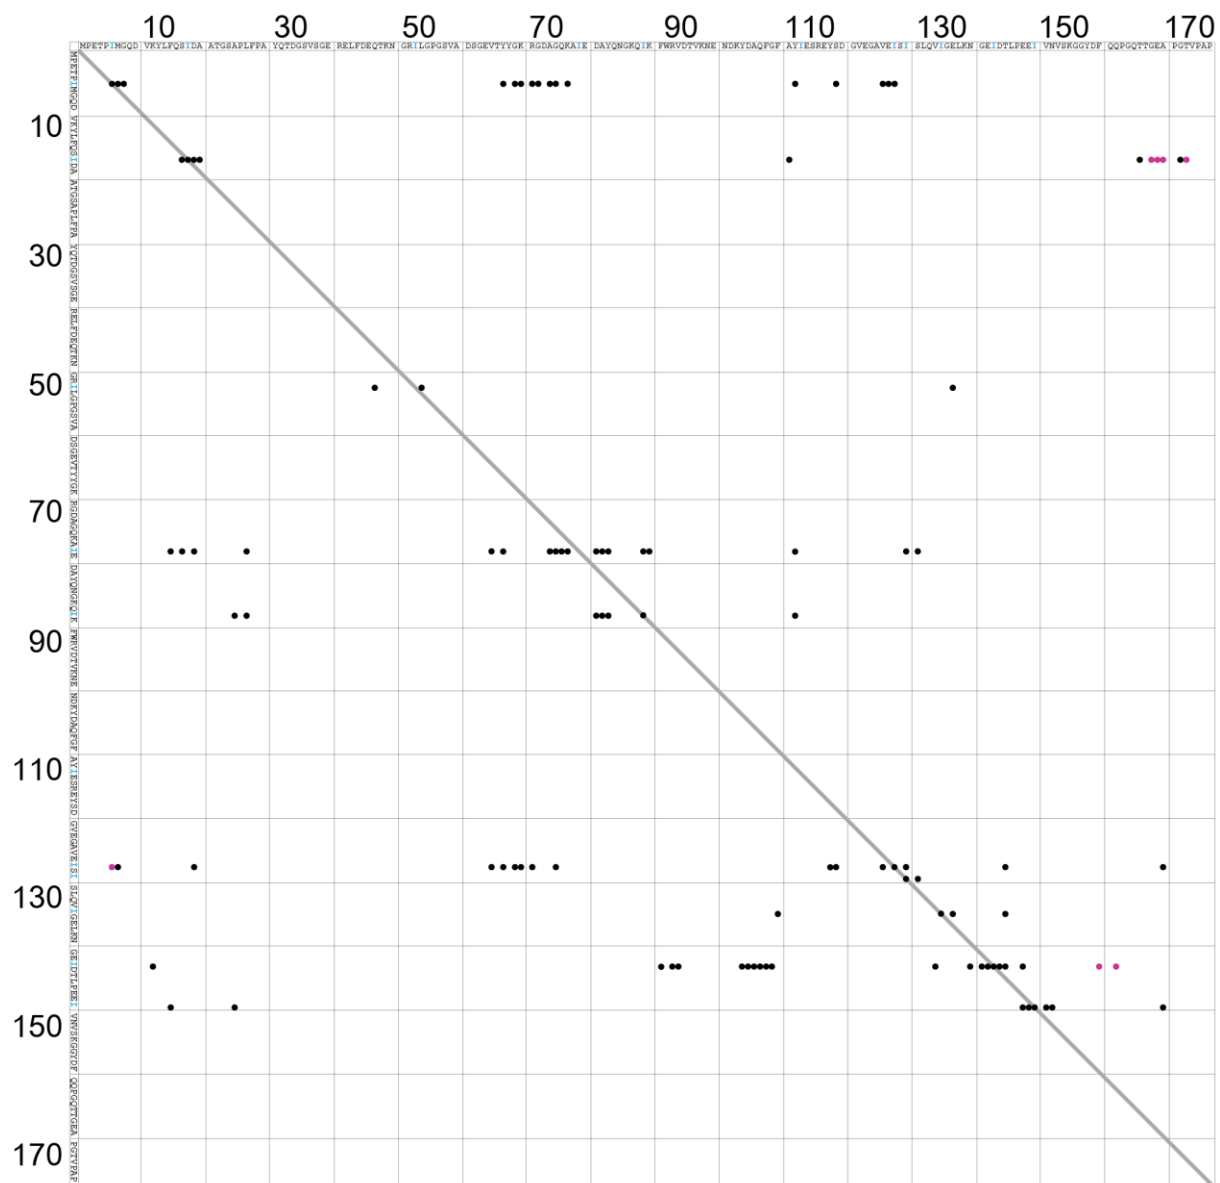

**Figure S4.** Unambiguous (based on chemical shifts; cutoffs  $^{15}\text{N}$  ~0.15 ppm, HN ~0.05 ppm, H $\delta$ 1 ~0.03 ppm) long-distance restraints visualized in a residue-residue plot. The horizontal axis represents the NH-groups, the vertical axis the isoleucine-C $\delta$ 1 groups. Intermolecular restraints are highlighted in magenta.

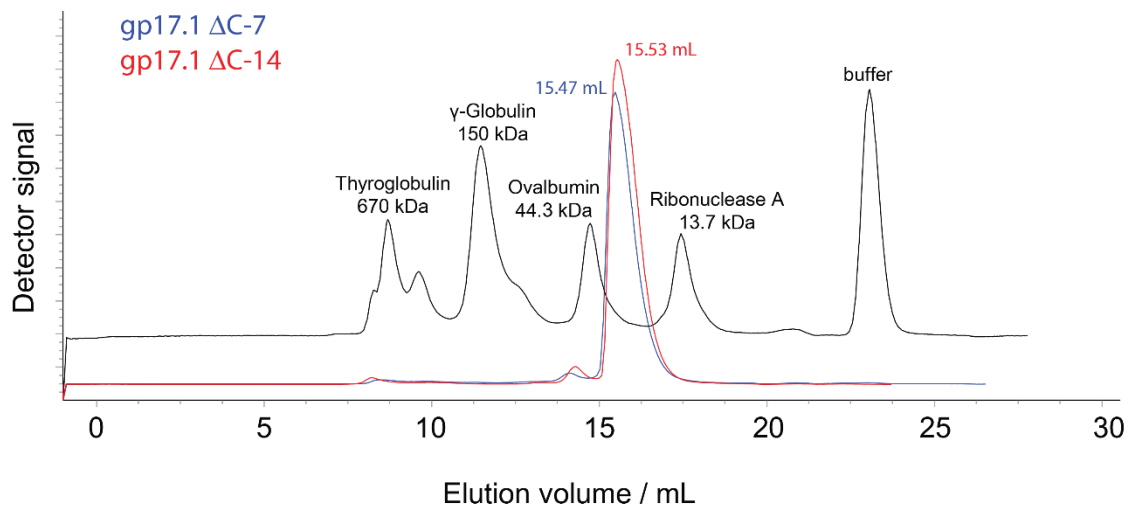

**Figure S5.** Size-exclusion chromatogram of  $\Delta$ C-7 and  $\Delta$ C-14 mutants of gp17.1. Protein samples were applied to a Superdex 200 Increase 10/300 GL column and separated with dialysis buffer (20 mM sodium phosphate, 500 mM sodium chloride, 1 mM EDTA, pH 7.4) using an Äkta system. For molecular weight calibration, a Protein Standard Mix 15-600 kDa from Sigma-Aldrich was used. The unit on the vertical axis is arbitrary.

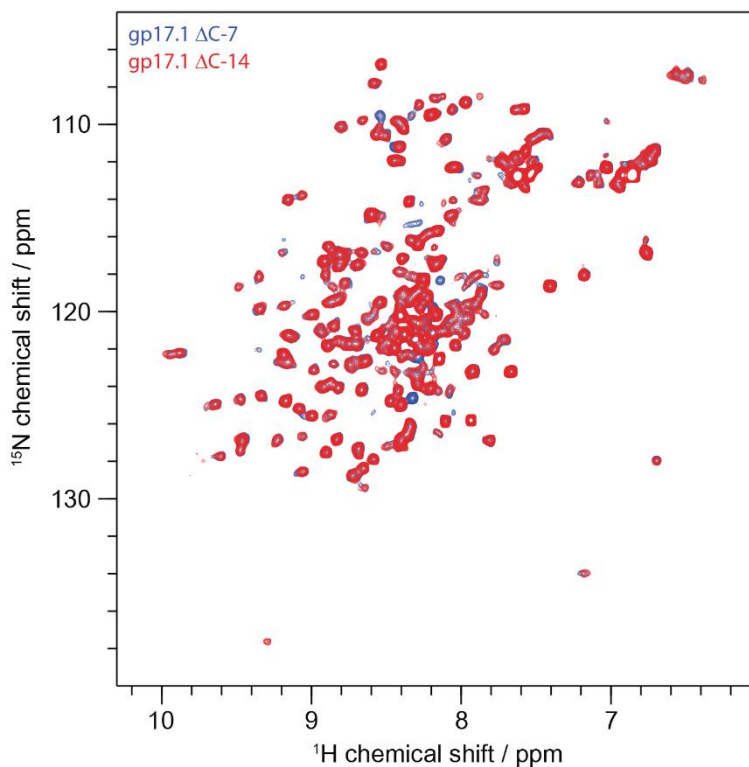

**Figure S6.** Solution NMR HSQC spectra of  $\Delta$ C-7 and  $\Delta$ C-14 mutants of gp17.1 at 25 °C and 750 MHz external magnetic field. Correlation times of  $\sim$ 18 ns could be approximated for both mutants.



**Table S1.** Pulse program parameters for all required steps of the described experiments. All experiments were conducted at a magic angle spinning rate of 40.0 kHz and an external  $B_0$  field corresponding to 900 MHz  $^1\text{H}$  Larmor frequency.

| Parameter                                                                              | Value                        |                              |                                 |
|----------------------------------------------------------------------------------------|------------------------------|------------------------------|---------------------------------|
| Experiment                                                                             | 2D hCH                       | 3D HNhH                      | 2D HccanH                       |
| <b>Recycle delay</b>                                                                   |                              |                              |                                 |
| Recycle delay                                                                          | 1 s                          | 1.15 s                       | 1 s                             |
| <b>90° initial <math>^1\text{H}</math> excitation pulse</b>                            |                              |                              |                                 |
| R.f. power                                                                             | 100 kHz                      | 100 kHz                      | 100 kHz                         |
| Duration                                                                               | 2.5 $\mu\text{s}$            | 2.5 $\mu\text{s}$            | 2.5 $\mu\text{s}$               |
| Carrier position                                                                       | 0.4 ppm                      | 8.5 ppm                      | 0.4 ppm                         |
| <b><math>^1\text{H}</math> evolution time</b>                                          |                              |                              |                                 |
| WALTZ r.f. power                                                                       |                              | 3.4 kHz ( $^{15}\text{N}$ )  | 13.8 kHz ( $^{13}\text{C}$ )    |
| WALTZ pulse duration                                                                   |                              | 60 $\mu\text{s}$             | 60 $\mu\text{s}$                |
| WALTZ carrier position                                                                 |                              | 117.7 ppm                    | 28.4 ppm                        |
| <b><math>^1\text{H}</math>-<math>^{15}\text{N}</math> CP step</b>                      |                              |                              |                                 |
| $^1\text{H}$ r.f. power                                                                |                              | 81 kHz                       |                                 |
| $^1\text{H}$ carrier position                                                          |                              | 8.5 ppm                      |                                 |
| $^{15}\text{N}$ r.f. power                                                             |                              | 29.6 kHz                     |                                 |
| $^{15}\text{N}$ carrier position                                                       |                              | 117.7 ppm                    |                                 |
| Ramp shape                                                                             |                              | Ramp 80-100% on $^1\text{H}$ |                                 |
| Duration                                                                               |                              | 1400 $\mu\text{s}$           |                                 |
| <b><math>^{15}\text{N}</math> evolution time</b>                                       |                              |                              |                                 |
| WALTZ r.f. power                                                                       |                              | 9.5 kHz ( $^1\text{H}$ )     |                                 |
| WALTZ pulse duration                                                                   |                              | 40 $\mu\text{s}$             |                                 |
| WALTZ carrier position                                                                 |                              | 8.5 ppm                      |                                 |
| <b><math>^1\text{H}</math>-<math>^{13}\text{C}</math> CP step</b>                      |                              |                              |                                 |
| $^1\text{H}$ r.f. power                                                                | 52.5 kHz                     |                              |                                 |
| $^1\text{H}$ carrier position                                                          | 0.4 ppm                      |                              |                                 |
| $^{13}\text{C}$ r.f. power                                                             | 10.2 kHz                     |                              |                                 |
| $^{13}\text{C}$ carrier position                                                       | 60.3 ppm                     |                              |                                 |
| Ramp shape                                                                             | Ramp 80-100% on $^1\text{H}$ |                              |                                 |
| Duration                                                                               | 6 ms                         |                              |                                 |
| <b><math>^{13}\text{C}</math> evolution time</b>                                       |                              |                              |                                 |
| WALTZ r.f. power                                                                       | 2.8 kHz ( $^1\text{H}$ )     |                              |                                 |
| WALTZ pulse duration                                                                   | 40 $\mu\text{s}$             |                              |                                 |
| WALTZ carrier position                                                                 | 0.4 ppm                      |                              |                                 |
| <b><math>^1\text{H}</math>-<math>^{13}\text{C}</math>CG1 CP step</b>                   |                              |                              |                                 |
| $^1\text{H}$ r.f. power                                                                |                              |                              | 52.5 kHz                        |
| $^1\text{H}$ carrier position                                                          |                              |                              | 0.4 ppm                         |
| $^{13}\text{C}$ CG1 r.f. power                                                         |                              |                              | 10.2 kHz                        |
| $^{13}\text{C}$ CG1 carrier position                                                   |                              |                              | 28.4 ppm                        |
| Ramp shape                                                                             |                              |                              | Ramp 80-100% on $^1\text{H}$    |
| Duration                                                                               |                              |                              | 1 ms                            |
| <b><math>^{13}\text{C}</math>CG1-<math>^{13}\text{C}</math>A DREAM/HORROR transfer</b> |                              |                              |                                 |
| DREAM pulse r.f. power                                                                 |                              |                              | 20.2 kHz                        |
| DREAM pulse shape                                                                      |                              |                              | Ramp 100-80%                    |
| DREAM pulse duration                                                                   |                              |                              | 15 ms                           |
| DREAM pulse carrier position                                                           |                              |                              | 61.5 ppm                        |
| <b><math>^{13}\text{C}</math>A-<math>^{15}\text{N}</math> CP step</b>                  |                              |                              |                                 |
| $^{13}\text{C}$ A r.f. power                                                           |                              |                              | 26.2 kHz                        |
| $^{13}\text{C}$ A carrier position                                                     |                              |                              | 61.5 ppm                        |
| $^{15}\text{N}$ r.f. power                                                             |                              |                              | 14.8 kHz                        |
| $^{15}\text{N}$ carrier position                                                       |                              |                              | 117.7 ppm                       |
| Ramp shape                                                                             |                              |                              | Ramp 80-100% on $^{15}\text{N}$ |
| Duration                                                                               |                              |                              | 10.5 ms                         |
| <b>90° <math>^{15}\text{N}/^{13}\text{C}</math> flip pulses</b>                        |                              |                              |                                 |

|                                                |                                |                                |                                |
|------------------------------------------------|--------------------------------|--------------------------------|--------------------------------|
| R.f. power                                     | 50 kHz                         | 35.7 kHz                       | 35.7 kHz                       |
| Duration                                       | 5 $\mu$ s                      | 7 $\mu$ s                      | 7 $\mu$ s                      |
| Carrier position                               | 60.3 ppm                       | 117.7 ppm                      | 117.7 ppm                      |
| <b>Water suppression</b>                       |                                |                                |                                |
| T delay                                        | 44 ms                          | 44 ms                          | 44 ms                          |
| Spoil pulse r.f. power                         | 43.6 kHz                       | 43.6 kHz                       | 43.6 kHz                       |
| Spoil pulse duration                           | 1 ms                           | 1 ms                           | 1 ms                           |
| Spoil pulse shape                              | Ramp 100-60%                   | Ramp 100-60%                   | Ramp 100-60%                   |
| First pulse duration in train                  | 33 ms                          | 33 ms                          | 33 ms                          |
| Second pulse duration in train                 | 56 ms                          | 56 ms                          | 56 ms                          |
| Train r.f. power                               | 13.8 kHz                       | 13.8 kHz                       | 13.8 kHz                       |
| Wat. sup. carrier position                     | 4.9 ppm                        | 4.9 ppm                        | 4.9 ppm                        |
| Loops through train (n)                        | 1                              | 1                              | 1                              |
| <b><sup>15</sup>N-<sup>1</sup>H CP step</b>    |                                |                                |                                |
| <sup>1</sup> H r.f. power                      |                                | 81.6 kHz                       | 79.3 kHz                       |
| <sup>1</sup> H carrier position                |                                | 8.5 ppm                        | 8.5 ppm                        |
| <sup>15</sup> N r.f. power                     |                                | 33.5 kHz                       | 33.5 kHz                       |
| <sup>15</sup> N carrier position               |                                | 117.7 ppm                      | 117.7 ppm                      |
| Ramp shape                                     |                                | Ramp 100-80% on <sup>1</sup> H | Ramp 100-80% on <sup>1</sup> H |
| Duration                                       |                                | 900 $\mu$ s                    | 900 $\mu$ s                    |
| <b>RFDR <sup>1</sup>H-<sup>1</sup>H Mixing</b> |                                |                                |                                |
| RFDR r.f. power                                |                                | 100 kHz                        |                                |
| RFDR mixing time                               |                                | 10 ms                          |                                |
| RFDR pulse carrier position                    |                                | 4.9 ppm                        |                                |
| <b><sup>13</sup>CX-<sup>1</sup>H CP step</b>   |                                |                                |                                |
| <sup>1</sup> H r.f. power                      | 52.5 kHz                       |                                |                                |
| <sup>1</sup> H carrier position                | 0.4 ppm                        |                                |                                |
| <sup>13</sup> CX r.f. power                    | 10.2 kHz                       |                                |                                |
| <sup>13</sup> CX carrier position              | 60.3 ppm                       |                                |                                |
| Ramp shape                                     | Ramp 100-80% on <sup>1</sup> H |                                |                                |
| Duration                                       | 6 ms                           |                                |                                |
| <b>Spin echo step</b>                          |                                |                                |                                |
| <sup>1</sup> H pulse r.f. power                | 100 kHz                        | 100 kHz                        | 100 kHz                        |
| <sup>1</sup> H pulse duration                  | 5 $\mu$ s                      | 5 $\mu$ s                      | 5 $\mu$ s                      |
| <sup>1</sup> H pulse carrier position          | 8.5 ppm                        | 8.5 ppm                        | 8.5 ppm                        |
| <b>Acquisition</b>                             |                                |                                |                                |
| <sup>15</sup> N WALTZ r.f. power               |                                | 3.4 kHz                        | 4.1 kHz                        |
| <sup>15</sup> N WALTZ pulse duration           |                                | 60 $\mu$ s                     | 60 $\mu$ s                     |
| <sup>15</sup> N WALTZ carrier position         |                                | 117.7 ppm                      | 117.7 ppm                      |
| <sup>13</sup> C WALTZ r.f. power               | 9.8 kHz                        | 5 kHz                          |                                |
| <sup>13</sup> C WALTZ pulse duration           | 60 $\mu$ s                     | 60 $\mu$ s                     |                                |
| <sup>13</sup> C WALTZ carrier position         | 60.3 ppm                       | 24.9 ppm                       |                                |

**Table S2.** Acquisition parameters for 2D and 3D spectra. The highest dimension is always the direct dimension.

| Experiment       | Acquisition time / ms (number of points) |                                |                                  |  | ns  | Total Number of acquired points | Total Time      |
|------------------|------------------------------------------|--------------------------------|----------------------------------|--|-----|---------------------------------|-----------------|
|                  | F1                                       | F2                             | F3                               |  |     |                                 |                 |
| 2D hCH           | 10 ms (600) ( <sup>13</sup> C)           | 30 ms (1610) ( <sup>1</sup> H) | N/A                              |  | 80  | 600                             | 18 h 18 min     |
| 2D HccanH        | 10 ms (220) ( <sup>1</sup> H)            | 8 ms (800) ( <sup>1</sup> H)   | N/A                              |  | 360 | 220                             | 1 d 6 h 35 min  |
| 3D HNHhH         | 15 ms (104) ( <sup>15</sup> N)           | 10 ms (80) ( <sup>1</sup> H)   | 20.8 ms (1118) ( <sup>1</sup> H) |  | 24  | 8320                            | 3 d 14 h 59 min |
| 3D HNHhH (mixed) | 15 ms (104) ( <sup>15</sup> N)           | 7.5 ms (60) ( <sup>1</sup> H)  | 20.8 ms (1118) ( <sup>1</sup> H) |  | 32  | 6240                            | 2 d 19 h 15 min |

**Table S3.** Processing parameters. The highest dimension is always the direct dimension.

| Experiment      | Points after FT        |                       |                      | Window function          |                          |                          |
|-----------------|------------------------|-----------------------|----------------------|--------------------------|--------------------------|--------------------------|
|                 | F1                     | F2                    | F3                   | F1                       | F2                       | F3                       |
| 2D hCH          | 2k ( <sup>13</sup> C)  | 4k ( <sup>1</sup> H)  | N/A                  | sin <sup>2</sup> , φ=60° | sin <sup>2</sup> , φ=60° | N/A                      |
| 2D HccanH       | 2k ( <sup>1</sup> H)   | 2k ( <sup>1</sup> H)  | N/A                  | sin <sup>2</sup> , φ=60° | sin <sup>2</sup> , φ=60° | N/A                      |
| 3D HNhH         | 128 ( <sup>15</sup> N) | 128 ( <sup>1</sup> H) | 4k ( <sup>1</sup> H) | sin <sup>2</sup> , φ=60° | sin <sup>2</sup> , φ=60° | sin <sup>2</sup> , φ=60° |
| 3D HNhH (mixed) | 128 ( <sup>15</sup> N) | 128 ( <sup>1</sup> H) | 4k ( <sup>1</sup> H) | sin <sup>2</sup> , φ=90° | sin <sup>2</sup> , φ=90° | sin <sup>2</sup> , φ=90° |

**Table S4.** Determined chemical shift values for gp17.1 isoleucines (deposited in the BMRB: ID 27468). Chemical shifts were referenced using internal DSS and are given in ppm. For some residues, a second set of resonances was identified and is marked with grey background color. The backbone assignment for gp17.1 is deposited in the BMRB: ID 27099.

| Residue | <sup>1</sup> H | <sup>15</sup> N | <sup>13</sup> C $\alpha$ | <sup>13</sup> C $\gamma$ 1 | <sup>13</sup> C $\delta$ 1 | <sup>1</sup> H $\delta$ 1 |
|---------|----------------|-----------------|--------------------------|----------------------------|----------------------------|---------------------------|
| 6 Ile   | 8.41           | 122.31          | 62.43                    | 27.74                      | 14.18                      | 0.91                      |
| 18 Ile  | 9.49           | 122.07          | 64.2                     | 23.86                      | 15.85                      | 1.01                      |
| 53 Ile  | 9.51           | 130.12          | 59.79                    | 25.94                      | 12.81                      | 0.52                      |
| 79 Ile  | 7.36           | 120.20          | 65.21                    | 29.69                      | 12.96                      | -0.09                     |
| 89 Ile  | 9.22           | 117.81          | 60.37                    | 28.85                      | 15.16                      | 0.97                      |
| 128 Ile | 9.68           | 129.16          | 59.89                    | 27.64                      | 14.59                      | 1.13                      |
| 128 Ile | 9.46           | 130.90          | 60.02                    | 28.19                      | 14.59                      | 1.10                      |
| 130 Ile | 8.95           | 121.18          | 57.88                    | 24.85                      | 14.04                      | 0.80                      |
| 135 Ile | 9.01           | 129.06          | 61.46                    | 27.99                      | 14.15                      | 0.58                      |
| 135 Ile | 9.15           | 130.04          | 63.52                    | 28.29                      | 14.16                      | 0.86                      |
| 143 Ile | 9.81           | 124.78          | 60.18                    | 28.28                      | 13.39                      | 0.36                      |
| 150 Ile | 7.54           | 116.75          | 62.79                    | 28.19                      | 14.04                      | 0.78                      |
| 150 Ile | 7.54           | 116.75          | 62.66                    | 28.10                      | 14.04                      | 0.72                      |

- [1] M. Zinke, P. Fricke, C. Samson, S. Hwang, J. S. Wall, S. Lange, S. Zinn-Justin, A. Lange, *Angew. Chemie Int. Ed.* **2017**, 1–6.
- [2] A. Böckmann, C. Gardiennet, R. Verel, A. Hunkeler, A. Loquet, G. Pintacuda, L. Emsley, B. H. Meier, A. Lesage, *J. Biomol. NMR* **2009**, *45*, 319–327.
- [3] P. Fricke, V. Chevelkov, M. Zinke, K. Giller, S. Becker, A. Lange, *Nat. Protoc.* **2017**, *12*, 764–782.
- [4] J. Anglister, S. Grzesiek, H. Ren, C. B. Klee, A. Bax, *J. Biomol. NMR* **1993**, *3*, 121–126.
